# Supplementary material for: Randomized Controlled Trial Comparing a Multidisciplinary Intervention by a Geriatrician and a Cardiologist to Usual Care after a Heart Failure Hospitalization in Older Patients: The SENECOR Study
Source: MDPI journal article supplement (doi:10.3390/jcm11071932), 2022-03-30
Supplement: s1 [file s1]

# Supplementary Material: Randomized Controlled Trial Comparing a Multidisciplinary Intervention by a Geriatrician and a Cardiologist to Usual Care after a Heart Failure Hospitalization in Older Patients: The SENECOR Study

Marta Herrero-Torres, Neus Badosa, Cristina Roqueta, Sonia Ruiz-Bustillo, Eduard Solé-González, Laia C. Belarte-Tornero, Sandra Valdivielso-Moré, Olga Vázquez and Núria Farré

Table S1. Schedule of events.

|                                                                            | Pre-Discharge | Baseline Visit | Month 3 | Month 6 | Month 12 |
|----------------------------------------------------------------------------|---------------|----------------|---------|---------|----------|
| Written informed consent                                                   | x             |                |         |         |          |
| Canadian Study of Health and Aging Clinical Frailty Scale                  | x             |                |         |         |          |
| Echocardiogram                                                             | x             |                |         |         |          |
| Electrocardiogram                                                          | x             |                |         |         |          |
| Blood test <sup>1</sup>                                                    | x             |                |         |         | x        |
| Lawton test                                                                | x             | x              |         |         | x        |
| Barthel test                                                               | x             | x              |         |         | x        |
| Pfeiffer test                                                              | x             | x              |         |         | x        |
| Medical history and baseline characteristics                               |               | x              |         |         |          |
| Geriatrician assessment (intervention group only) <sup>2</sup>             |               | x              |         |         | x        |
| Quality of life (EQ-5D, VAS, KCCQ)                                         |               | x              |         |         | x        |
| Current medication                                                         |               | x              | x       | x       | x        |
| Physical examination, weight, blood pressure, heart rate, SpO <sub>2</sub> |               | x              | x       | x       | x        |
| NYHA functional class                                                      |               | x              | x       | x       | x        |
| Hospitalization, ED visit or IV ambulatory diuretics                       |               | x              | x       | x       | x        |

<sup>1</sup> Blood test: creatinine, glomerular filtration, hemogram, ferritin, transferrin saturation, total proteins, albumin, thyroid-stimulating hormone (TSH), liver function test, vitamin B12, folic acid, and vitamin D. On discharge day, an analysis of ultrasensitive troponin T and N-terminal prohormone of brain natriuretic peptide (NT-proBNP). <sup>2</sup> Gijón socio-family assessment scale (abbreviated and modified) (Barcelona version), Geriatric Depression Scale Yesavage, Mini-Nutritional Assessment Short Form, presence of geriatric syndromes (constipation, falls, pressure ulcers, polypharmacy, incontinence, insomnia). ED: Emergency room, EQ-5D: European Quality of Life -5 Dimensions test, IV: intravenous, NYHA: New York Heart Association, KCCQ: Kansas City Cardiomyopathy Questionnaire (KCCQ), SpO<sub>2</sub>: Oxygen saturation, VAS: Visual Analog Scale.

**Table S2.** Geriatrician assessment and interdisciplinary interventions carried out in each area evaluated at the baseline visit.

| Sphere or Geriatric Syndrome Assess | Type of Intervention                                        | Number of Patients (%) Who Received the Intervention |
|-------------------------------------|-------------------------------------------------------------|------------------------------------------------------|
| Social sphere                       | Intervention by a health social worker                      | 1 (1.4)                                              |
| Emotional sphere                    | Pharmacological treatment of depression                     | 7 (9.9)                                              |
| Nutritional status                  | Education and intervention of nutritional status            | 43 (60.6)                                            |
|                                     | Administration of supplemental enteral nutrition            | 1 (1.4)                                              |
| Daily living activities             | Functional rehabilitation program (home physiotherapy)      | 15 (21.1)                                            |
|                                     | Physical exercise guidelines                                | 21 (30)                                              |
|                                     | Education of improving the basic activities of daily living | 3 (4.2)                                              |
| Constipation                        | Intervention of constipation                                | 14 (19.7)                                            |
| Falls                               | Fall prevention education                                   | 20 (28.2)                                            |
| Pressure ulcers                     | Intervention in pressure ulcers                             | 0 (0)                                                |
| Polypharmacy                        | Review of medicines and deprescription                      | 11 (15.5)                                            |
| Incontinence                        | Education of urinary incontinence                           | 25 (35.2)                                            |
|                                     | Education of fecal incontinence                             | 2 (2.8)                                              |
| Insomnia                            | Non-pharmacological treatment for insomnia                  | 19 (26.8)                                            |
|                                     | Pharmacological                                             | 5 (7)                                                |
| Dementia/cognitive impairment       | Education on cognitive impairment                           | 4 (5.6)                                              |
|                                     | Referral to the dementia outpatient clinic                  | 1 (1.4)                                              |
|                                     | Health education on the management of delirium              | 5 (7.1)                                              |

Data are based on the 71 patients that completed the baseline visit.
